# Supplementary material for: One-pot synthesis of hybrid TiO2–polyaniline nanoparticles by self-catalyzed hydroamination and oxidative polymerization from TiO2–methacrylic acid nanoparticles
Source: Royal Society of Chemistry journal article supplement (doi:10.1039/c1cc13137k), 2011-01-01
Supplement: c1cc13137k.pdf [file c1cc13137k.pdf]

# One-Pot Synthesis of Hybrid TiO<sub>2</sub>-Polyaniline Nanoparticles by Self-catalyzed Hydroamination and Oxidative Polymerization from TiO<sub>2</sub>-Methacrylic Acid Nanoparticles

Woo Jin Bae,<sup>a</sup> Andrew R. Davis,<sup>a</sup> Jaewoong Jung,<sup>b</sup> Won Ho Jo,<sup>b</sup> Kenneth R. Carter,<sup>\*a</sup> E. Bryan Coughlin<sup>\*a</sup>

## Supporting information

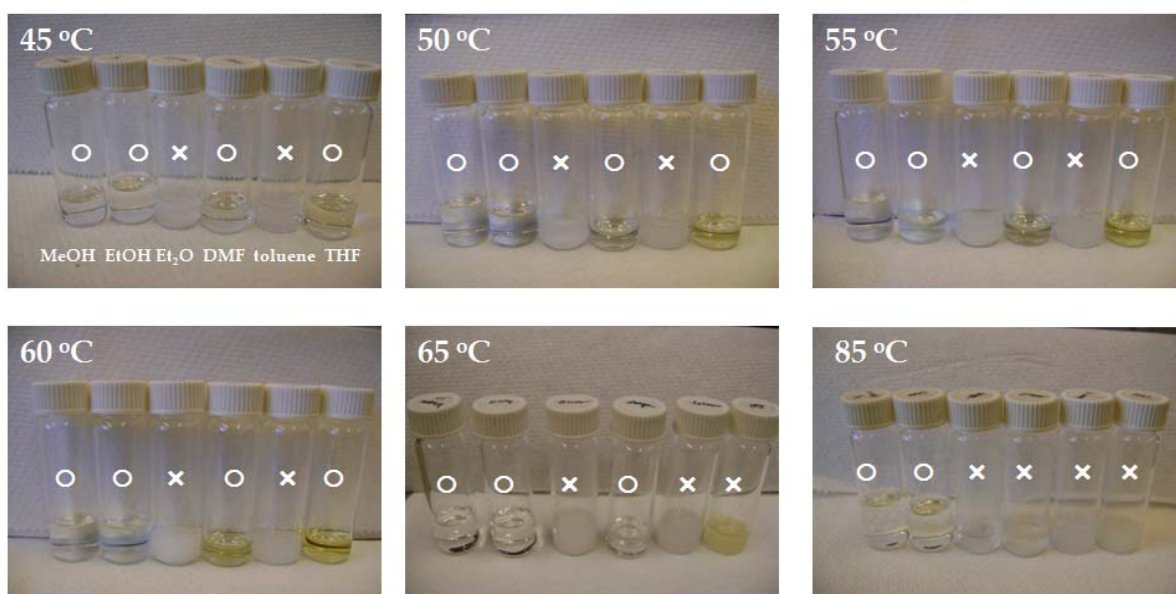

**Figure 1S)** 1 mg of TiO<sub>2</sub>-MAA nanoparticles synthesized at various temperatures from 45 °C to 85 °C in 1 ml of various solvents (MeOH, EtOH, Et<sub>2</sub>O, DMF, toluene and THF). O: soluble, X: insoluble

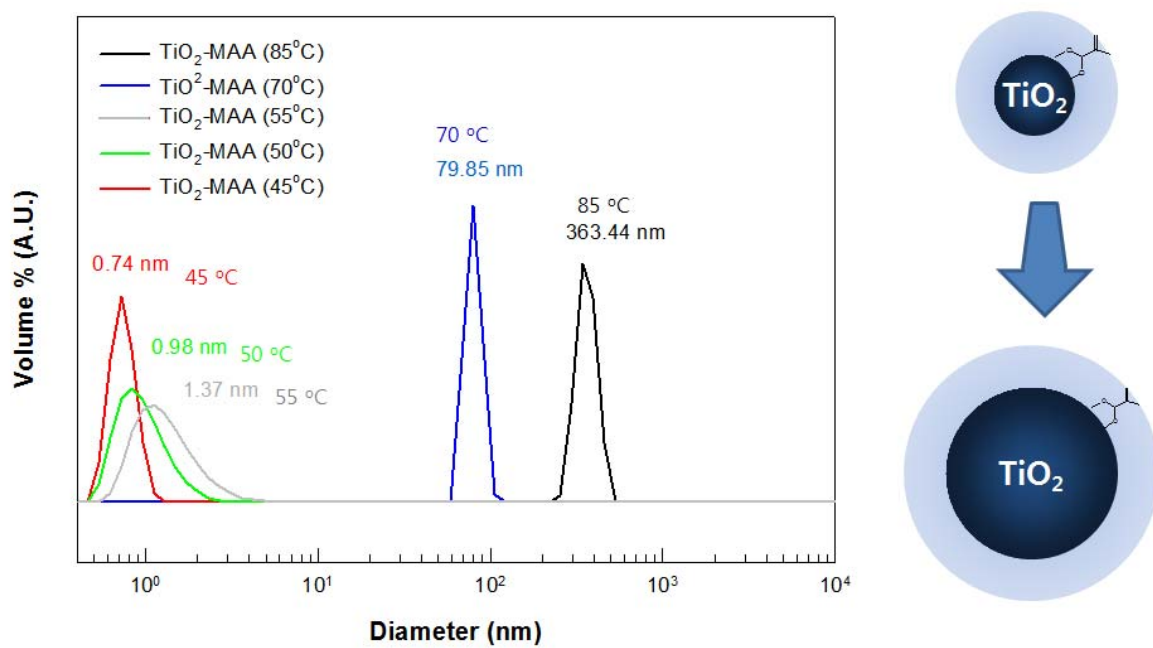

**Figure 2S)** Size measurement of TiO<sub>2</sub>-MAA nanoparticle by dynamic light scattering (DLS)

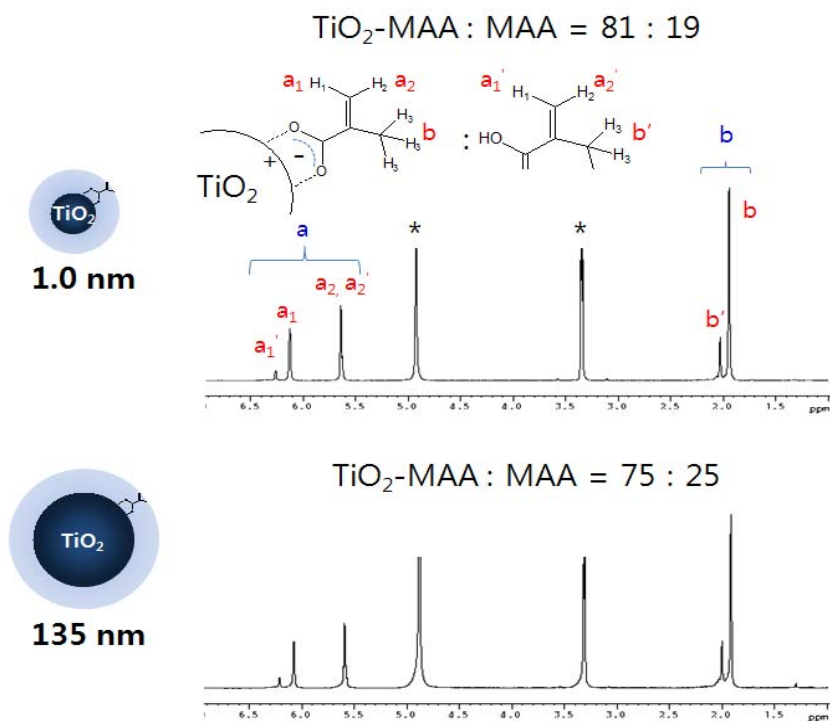

**Figure 3S)**  $^1\text{H}$  NMR spectra of  $\text{TiO}_2\text{-MAA}$  nanoparticle used for the further hydroamination with aniline (in  $\text{CD}_3\text{OD}$ )

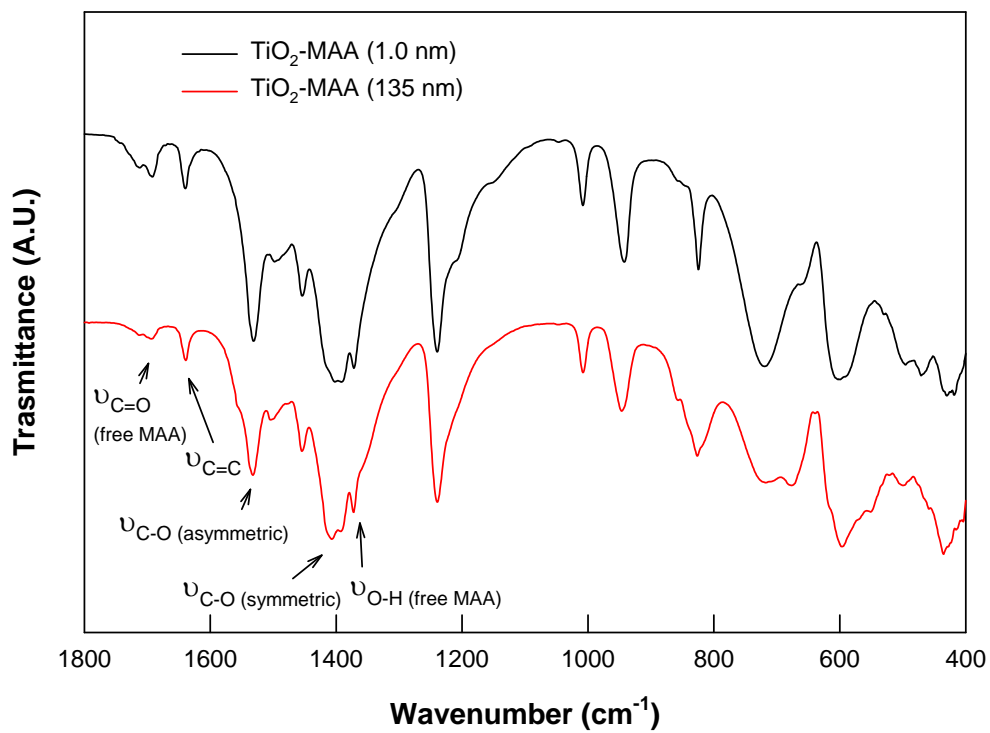

**Figure 4S) FTIR spectra of  $\text{TiO}_2$ -MAA nanoparticle used for the further hydroamination with aniline**

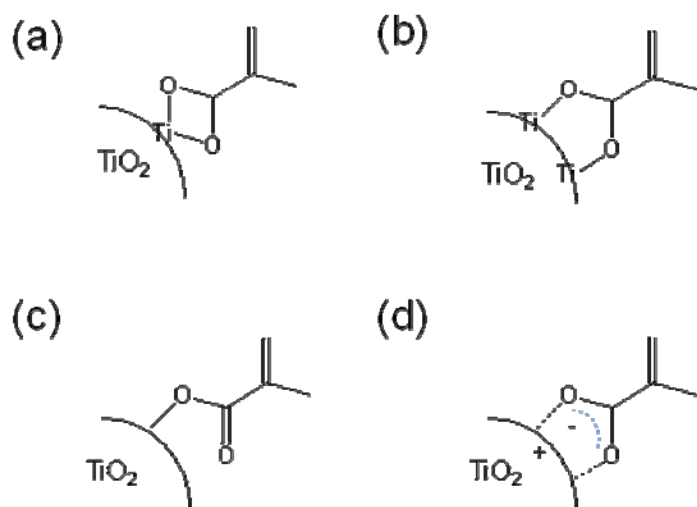

**Figure 5S)** The schematic representation of binding geometries between  $\text{TiO}_2$  and MAA, (a) bidentate, (b) bibrigding, (c) monodentate and (d) two-anchoring carboxylate ring mode

**Table 1S)** The nomenclature for hybrid TiO<sub>2</sub>-PANI and TiO<sub>2</sub>/PANI blends according to the different NP size and ANI:TiO<sub>2</sub>-MAA feed ratio

| <b>Sample code</b>         | <b>ANI</b> | <b>TiO<sub>2</sub>-MAA</b> | <b>NP Size</b> | <b>Etc.</b> |
|----------------------------|------------|----------------------------|----------------|-------------|
| TiO <sub>2</sub> -PANI-1-1 | 1 ml       | 10 mg                      | 1 nm           | hybrid      |
| TiO <sub>2</sub> -PANI-1-2 | 1 ml       | 30 mg                      | 1 nm           | hybrid      |
| TiO <sub>2</sub> -PANI-1-3 | 1 ml       | 50 mg                      | 1 nm           | hybrid      |
| TiO <sub>2</sub> -PANI-1-4 | 1 ml       | 100 mg                     | 1 nm           | hybrid      |
| TiO <sub>2</sub> -PANI-2-1 | 1 ml       | 10 mg                      | 135 nm         | hybrid      |
| TiO <sub>2</sub> -PANI-2-2 | 1 ml       | 30 mg                      | 135 nm         | hybrid      |
| TiO <sub>2</sub> /PANI-1   | 1 ml       | 10 mg                      | 1 nm           | blend       |
| TiO <sub>2</sub> /PAN-2    | 1 ml       | 30 mg                      | 1 nm           | blend       |
| PANI                       | 1 ml       | -                          | -              | homopolymer |

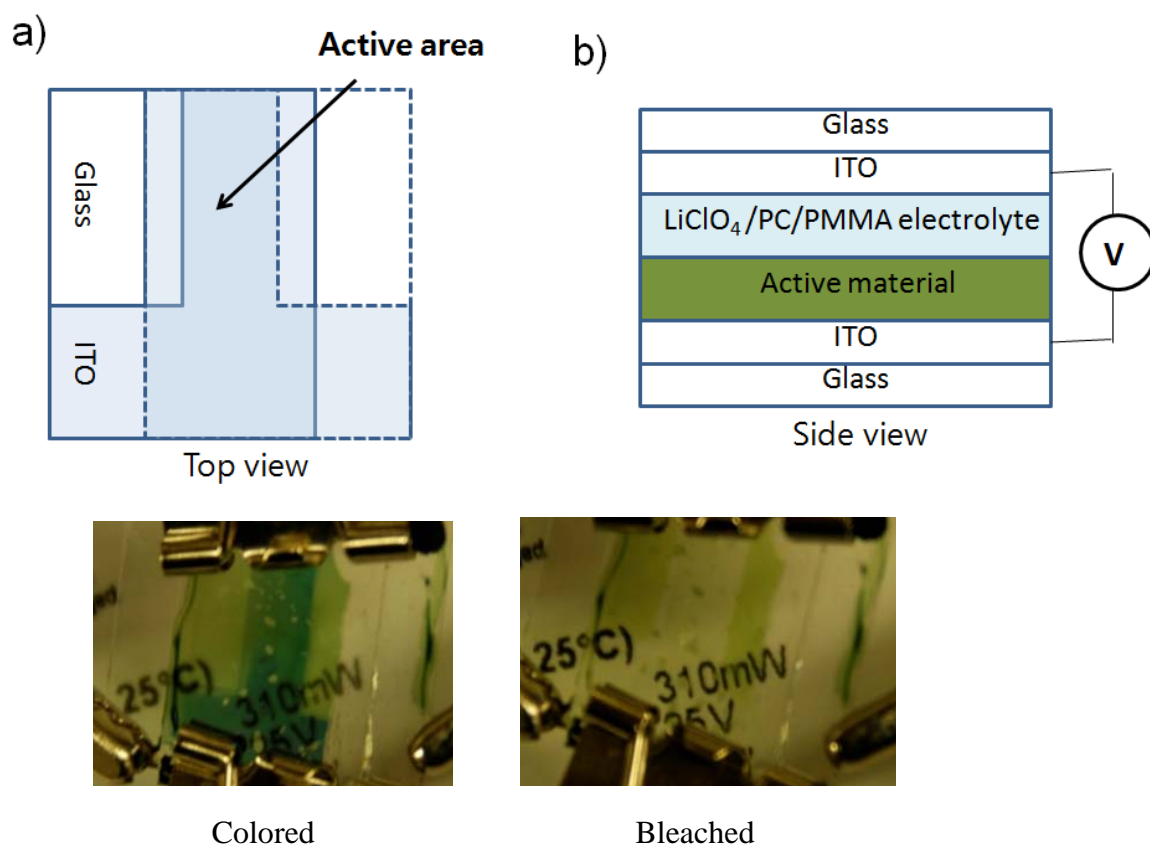

**Figure 6S)** Electrochromic device structure (a) from top view and (b) from side view

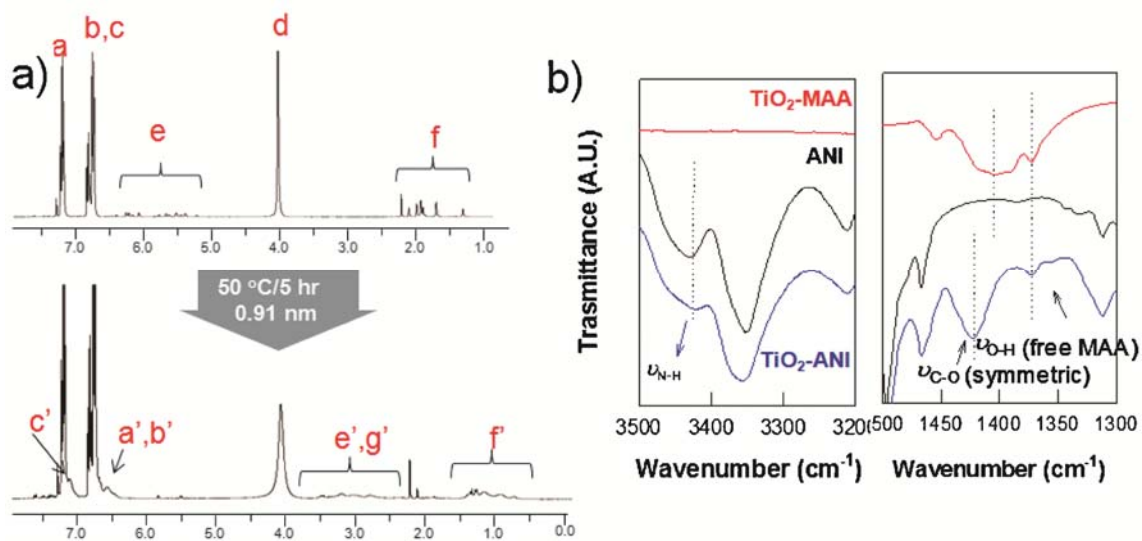

**Figure 7S)** (a)  $^1\text{H}$  NMR spectra of  $\text{TiO}_2$  MAA in aniline before and after hydroamination and (b) FTIR spectra of aniline and the  $\text{TiO}_2$  MAA nanoparticles before and after hydroamination.
